# Supplementary material for: The size of savannah Africa: a lion’s (Panthera leo) view
Source: Springer Nature journal article supplement (doi:10.1007/s10531-012-0381-4), 2012-12-01
Supplement: MOESM1 [file 10531_2012_381_MOESM1_ESM.doc]

Supplemental materials for

The size of savannah Africa: a lion’s view

Attached to this supplement is an Excel database of lion population locations and numbers. This is a single, concise database that compiles all of the studies of lion population and distribution since Chardonnet (2002). Matching the database is an extra distribution map. We created the lion’s distribution using a process we detail in the Methods. We used a hierarchical, rule-based system to modify, and sometimes maintain, existing distributional boundaries (lion conservation units).

There are two additional supplemental materials. Lion_areas zip file contains the lion area shapefile for ArcGIS (made in ArcGIS 10). UILC_Dakar2E16 zip file contains the user identified land conversion dataset. Both files have ReadMe files for additional help.

Table S1. Population estimates and associated details for all lion areas. If a source gives a range for the lion population of an area, we use the mean value as our population estimate. Each lion area is associated with a lion conservation unit, if relevant. We identify lion areas that qualify as either a potential stronghold or stronghold. The IUCN population trend is given for strongholds and potential strongholds; however, this information is a minimum of 5 years old and conditions may have changed.

Abbreviations: CAR & RCA = Central African Republic, DRC = Democratic Republic of Congo, Pop’n = Population, PAs = Protected Areas.

| **Lion Area** | **ID** | **Pop’n size** | **Area (km²)** | **Stronghold** | **Pop’n size in PAs** | **IUCN Trend (2006a, b)** | **Country** | **Associated IUCN LCU (2006a, b)** | **Source** |
| --- | --- | --- | --- | --- | --- | --- | --- | --- | --- |
| **Western Africa** |  |  |  |  |  |  |  |  |  |
| Niokolo-Guinea | 1 | <50 | 90,384 |  |  |  | Senegal, Mali, Guinea-Bissau, Guinea | Niokolo-Guinea | Henschel pers. comm. |
| Haut Niger | 2 | 6 | 613 |  |  |  | Guinea | Niokolo-Guinea | Brugiere and Magassouba 2003 |
| W-Arly-Pendjari | 3 | 350 | 29,403 | Potential | 350 | Stable | Benin, Burkina Faso, Niger | W-Arly-Pendjari | De Iongh pers. comm. |
| Mt Kouffe-Wari Maro | 4 | 3 | 3,152 |  |  |  | Benin | Mt Kouffe/Wari Maro | Pellerin et al. 2009 |
| Alibori Superieur | 5 | 18 | 1,742 |  |  |  | Benin | N/A | Pellerin et al. 2009 |
| Trois Rivieres | 6 | 19 | 1,939 |  |  |  | Benin | N/A | Pellerin et al. 2009 |
| Kainji Lake | 7 | 32 | 4,171 |  |  |  | Nigeria | Kainji Lake | Nyanganji et al. 2012 |
| Yankari | 8 | 2 | 2,380 |  |  |  | Nigeria | Yankari | Nyanganji et al. 2012 |
| **W. Africa Totals:** |  | **480** | **133,784** |  |  |  |  |  |  |
| **Central Africa** |  |  |  |  |  |  |  |  |  |
| Waza | 9 | 17 | 1,452 |  |  |  | Cameroon | Waza | Tumenta et al. 2010 |
| Benoue Complex | 10 | 200 | 14,682 |  |  |  | Cameroon | Benoue Complex-Gashaka Gumti | Croes et al. 2011 |
| Bozoum | 11 | 4 | 8,383 |  |  |  | CAR | N/A | Mesochina et al. 2010a |
| Nana-Barya | 12 | 4 | 2,314 |  |  |  | CAR | N/A | Mesochina et al. 2010a |
| SE Chad | 13 | 400 | 133,408 | Potential* | 140 | Stable | Chad | Chad-RCA | Our interpretationˠ, Vanherle 2006 |
| E Central African Republic | 14 | 1,244 | 328,721 | Potential* | 148 | Stable | CAR | Chad-RCA | Mesochina et al. 2010a |
| Garamba-Bili Uere Complex | 15 | 175 | 115,671 |  |  |  | DRC | Garamba-Bili Uere Complex | IUCN 2006b |
| SW Sudan | 16 | 375 | 331,834 |  |  |  | South Sudan, Sudan | SW Sudan | IUCN 2006b |
| **C. Africa Totals:** |  | **2,419** | **936,465** |  |  |  |  |  |  |
| **Totals without SE Chad, Sudan, South Sudan:** |  | **1,784** | **472,723** |  |  |  |  |  |  |
| ˠ Used density estimate of 0.2 per 100 km² | | | |  |  |  |  |  |  |
| * Two lion areas make up a single Chad-RCA potential stronghold | | | | |  |  |  |  |  |
| **Eastern Africa** |  |  |  |  |  |  |  |  |  |
| Boma-Gambella | 17 | 500 | 106,941 | Potential | ~500 | Unknown | Ethiopia, South Sudan | Boma-Gambella | Gebresenbet et al. 2009 |
| South Omo | 18 | 200 | 22,483 |  |  |  | Ethiopia | South Omo | Gebresenbet et al. 2009 |
| Nechisar | 19 | 10 | 1,030 |  |  |  | Ethiopia | N/A | Bauer and Fikerte pers. comm. |
| Bale | 20 | 50 | 2,373 |  |  |  | Ethiopia | Bale | Gebresenbet et al. 2009 |
| Welmel-Genale | 21 | 100 | 6,649 |  |  |  | Ethiopia | Welmel-Genale | Gebresenbet et al. 2009 |
| Awash | 22 | 50 | 25,302 |  |  |  | Ethiopia | Awash | Gebresenbet et al. 2009 |
| Ogaden | 23 | 100 | 35,405 |  |  |  | Ethiopia | Ogaden | Gebresenbet et al. 2009 |
| Greater Virunga | 24 | 210 | 5,583 |  |  |  | DRC, Uganda | Albertine South | Treves et al. 2009; Mudumba et al. 2010; |
| Toro-Semiliki | 25 | 5 | 538 |  |  |  | Uganda | Albertine North | Mudumba et al. 2010 |
| Lake Mburo | 26 | 3 | 373 |  |  |  | Uganda | N/A | Mudumba et al. 2010 |
| Murchison Falls | 27 | 132 | 3,889 |  |  |  | Uganda | Murchison Falls | Mudumba et al. 2010 |
| Kidepo Valley | 28 | <182 | 11,064 |  |  |  | South Sudan, Uganda | Kidepo Valley - Sudan, Kidpeo Valley - Uganda | IUCN 2006a; Mudumba et al. 2010; |
| Laikipia-Samburu | 29 | 271 | 35,511 | Potential | 46 | Stable | Kenya | Laikipia-Samburu | Bhalla and Cotterill pers. comm. |
| Meru | 30 | 40 | 7,365 |  |  |  | Kenya | Meru | KWS 2009 |
| Arawale-Bush Bush | 31 | 750 | 22,540 |  |  |  | Kenya, Somalia | Bush Bush | IUCN 2006a |
| Arboweerow-Alafuuto | 32 | 175 | 24,527 |  |  |  | Somalia | Arboweerow-Alafuuto | IUCN 2006a |
| Luama | 33 | <50 | 5,197 |  |  |  | DRC | Luama Hunting Reserve | IUCN 2006a |
| Itombwe Massif Savanna | 34 | <50 | 3,244 |  |  |  | DRC | Itombwe Massif Savanna | IUCN 2006a |
| NW Tanzania | 35 | 105 | 4,703 |  |  |  | Tanzania | Dar-Biharamulo | Mesochina et al. 2010b |
| Ruaha-Rungwa | 36 | 3,779 | 195,993 | Stronghold | 2,235 | Stable | Tanzania | Ruaha-Rungwa | Mesochina et al. 2010b |
| Mpanga Kipengere | 37 | 14 | 958 |  |  |  | Tanzania | N/A | Mesochina et al. 2010b |
| Swaga Swaga | 38 | 102 | 7,242 |  |  |  | Tanzania | Dar-Biharamulo | Mesochina et al. 2010b |
| Serengeti-Mara | 39 | 3,673 | 35,852 | Stronghold | 3,516 | Increasing | Kenya, Tanzania | Serengeti-Mara | KWS 2009; Mesochina et al. 2010b |
| Nairobi | 40 | <30 | 830 |  |  |  | Kenya | Maasai Steppe | Mbithi unpub. data |
| Tsavo-Mkomazi | 41 | 880 | 39,216 | Stronghold | 820 | Decreasingᶧ | Kenya, Tanzania | Maasai Steppe | KWS 2009; Mesochina et al. 2010b |
| Tarangire | 42 | 731 | 28,771 | Potential | 208 | Decreasing | Tanzania | Maasai Steppe | Mesochina et al. 2010b |
| Wami Mbiki-Saadani | 43 | 136 | 8,787 |  |  |  | Tanzania | Dar-Biharamulo | Mesochina et al. 2010b |
| Selous | 44 | 7,644 | 138,035 | Stronghold | 4,953 | Stable | Tanzania | Selous | Mesochina et al. 2010b |
| **E. Africa Totals:** |  | **19,972** | **780,401** |  |  |  |  |  |  |
| **without Somalia:** |  | **19,047** | **733,334** |  |  |  |  |  |  |
| ᶧ The trend within Tsavo NP is believed to be stable, but lions are killed outside the protected area | | | | | | | |  |  |
| **Southern Africa** |  |  |  |  |  |  |  |  |  |
| Kissama-Mumbondo | 45 | <10 | 4,593 |  |  |  | Angola | Kissama-Mumbondo | IUCN 2006a |
| Bocoio-Camucuio | 46 | 55 | 22,005 |  |  |  | Angola | Bocoio-Camucuio | IUCN 2006a |
| SE Angola | 47 | 1905 | 386,962 |  |  |  | Angola | Bicuar, Mupa Cubati, Cuando Cubango, Luchazes, Cameia Lucusse, Alto Zambezi | IUCN 2006a |
| Liuwa Plains | 48 | 4 | 3,866 |  |  |  | Zambia | Liuwa Plains | Becker pers. comm. |
| Sioma Ngwezi | 49 | <50 | 4,155 |  |  |  | Zambia | Sioma Ngwezi | IUCN 2006a |
| Kafue | 50 | 386 | 58,898 | Potential | 386 | Stable | Zambia | Kafue | Becker et al. 2012 |
| Nsumbu | 51 | <50 | 5,650 |  |  |  | Zambia | Sumbu Complex | Becker pers. comm. |
| Luangwa | 52 | 574 | 72,992 | Stronghold | 574 | Stable | Malawi, Zambia | Vwaza, North Luangwa, South Luangwa, Petauke Corridor | Becker et al. 2012; Mesochina et al. 2010c |
| Kasungu | 53 | 6 | 2,341 |  |  |  | Malawi | Kasungu | Mesochina et al. 2010c |
| Nkhota Kota | 54 | 18 | 1,846 |  |  |  | Malawi | Nkotakota | Mesochina et al. 2010c |
| Etosha-Kunene | 55 | 455 | 123,800 | Potential | ~315-595 | Increasing | Angola, Namibia | Etosha-Kunene | IUCN 2006a |
| Khaudom-Caprivi | 56 | 150 | 92,372 |  |  |  | Namibia | Khaudom-Caprivi | IUCN 2006a |
| Xaixai | 57 | 75 | 12,484 |  |  |  | Botswana | Xaixai | IUCN 2006a |
| Kgalagadi | 58 | 800 | 163,329 | Stronghold | ~800 | Stable | Botswana, South Africa | Kgalagadi | Funston pers. comm. |
| Okavango-Hwange | 59 | 2,300 | 99,552 | Stronghold | ~2300 | Stable | Botswana, Zimbabwe | Okavango-Hwange | IUCN 2006a |
| Greater Mapungubwe | 60 | 25 | 5,158 |  |  |  | Botswana, Zimbabwe, South Africa | Shashe-Limpopo | Shashe Limpopo Predator Research Group 2010 |
| Bubye | 61 | 200 | 4,875 |  |  |  | Zimbabwe |  | Trethowan pers. comm. |
| Mid-Zambezi | 62 | 755 | 64,672 | Stronghold | ~350-650 | Stable | Mozambique, Zambia, Zimbabwe | Mid-Zambezi, MOZ South of Labannakass, Omay, Matusadona | IUCN 2006a; Chardonnet et al. 2009; Jacobson et al. unpub. data |
| Tete South of Cahora Bassa | 63 | 59 | 13,612 |  |  |  | Mozambique | MOZ South of Labannakass | Chardonnet et al. 2009 |
| Niassa | 64 | 1,573 | 177,559 | Stronghold | 1,080 | Increasing | Mozambique, Tanzania | Niassa Reserve, Greater Niassa | Chardonnet et al. 2009; Begg and Begg 2010; Mesochina et al. 2010b |
| Gile | 65 | 45 | 22,322 |  |  |  | Mozambique | Gile | Chardonnet et al. 2009 |
| Gorongosa-Marromeu | 66 | 229 | 46,781 |  |  |  | Mozambique | Gorongosa/ Marromeu | Chardonnet et al. 2009 |
| Great Limpopo | 67 | 2,311 | 150,347 | Stronghold | 2,179 | Increasing | Mozambique, South Africa, Zimbabwe | Greater Limpopo | Chardonnet et al. 2009; Ferreira and Funston 2010; Funston et al. 2011; Groom and Brand 2011 |
| **S. Africa Totals:** |  | **12,036** | **1,540,171** |  |  |  |  |  |  |
| **without Angola:** |  | **10,066** | **1,126,611** |  |  |  |  |  |  |
| **Potential Strongholds (7):** |  | **4,337** | **845,453** |  | **~2,233** |  |  |  |  |
| **Strongholds (10):** |  | **24,289** | **1,137,547** |  | **~18,957** |  |  |  |  |
|  |  |  |  |  |  |  |  |  |  |
| **Grand Total:** |  | **34,907** | **3,390,821** |  |  |  |  |  |  |
| **Totals without Angola, SE Chad, Somalia, Sudan, South Sudan:** |  | **31,377** | **2,466,452** |  |  |  |  |  |  |

Table S2. Within the four focus areas, we compare the user-identified land conversion layer with existing datasets — human population density CIESEN (CIESEN and CIAT 2005) and ESA GlobCover (ESA and UCLouvain 2010). We calculated areas of overlap at four different human population density levels and for land classified as developed by ESA GlobCover for five comparisons per focus area.

Table S3. Lion conservation units (IUCN 2006a, b) that no longer have permanent lions and are not included as lion areas.

| **LCU** | **Former Population Size** | **Area (km2)** | **Region** | **Country** | **Source** |
| --- | --- | --- | --- | --- | --- |
| Boucle Baoule | 30-50 | 5,029 | West | Mali | Henschel pers. comm. |
| Comoe-Leraba | <50 | 22,880 | West | Burkina Faso, Ivory Coast | Henschel et al. (2010) |
| Gbele Ecosystem | <50 | 1,510 | West | Ghana | Henschel et al. (2010) |
| Nazinga-Sissili | <50 | 2,510 | West | Burkina Faso, Ghana | Henschel et al. (2010) |
| Mole | <50 | 6,790 | West | Ghana | Henschel et al. (2010) |
| Bui-White Volta Ecosystem | 10-20 | 5,230 | West | Ghana | Henschel et al. (2010) |
| Digya | <50 | 3,180 | West | Ghana | Henschel et al. (2010) |
| Oti-Mandouri | <50 | 990 | West | Togo | Chardonnet (2002), Bauer and Van Der Merwe (2004) |
| Old Oyo | <5 | 1,700 | West | Nigeria | Henschel et al. (2010) |
| Kamuku/ Kwiambana | 25-35 | 3,220 | West | Nigeria | Henschel et al. (2010) |
| Lame-Burra/ Falgore | 25-35 | 4,390 | West | Nigeria | Henschel et al. (2010) |
| Odzala | <50 | 1,890 | Central | Congo | Henschel et al. (2010) |
| Upemba | <50 | 1,430 | Southern | DRC | Henschel et al. (2010) |
| Kundelungu | <50 | 410 | Southern | DRC | Henschel et al. (2010) |
| Namizimu | <10 | 280 | Southern | Malawi | Mesochina et al. (2010c) |
| Mangochi | <10 | 430 | Southern | Malawi | Mesochina et al. (2010c) |
| Nyika – MW | <10 | 2,770 | Southern | Malawi | Mesochina et al. (2010c) |
| Liwonde | <10 | 400 | Southern | Malawi | Mesochina et al. (2010c) |
| **Totals:** | **<610** | **65,039** |  |  |  |

Table S4. New lion areas that are not contained within lion conservation units from IUCN (2006a, b).

| **Lion Area** | **Population Size** | **Area (km2)** | **Region** | **Country** | **Source** |
| --- | --- | --- | --- | --- | --- |
| Alibori Superieur | 18 | 1,742 | West | Benin | Pellerin et al. (2009) |
| Trois Rivieres | 19 | 1,939 | West | Benin | Pellerin et al. (2009) |
| Nana-Barya | 4 | 2,314 | Central | Central African Republic | Mesochina et al. (2010a) |
| Bozoum | 4 | 8,383 | Central | Central African Republic | Mesochina et al. (2010a) |
| Nechisar | 10 | 1,030 | East | Ethiopia | Bauer and Fikerte pers. comm. |
| Lake Mburo | 3 | 373 | East | Uganda | Mudumba et al. (2010) |
| Mpanga Kipengere | 14 | 958 | East | Tanzania | Mesochina et al. (2010b) |
| Bubye Valley | 200 | 6,140 | Southern | Zimbabwe | Trethowan pers. comm. |
| **Totals:** | **272** | **22,879** |  |  |  |

Table S5. Comparison of the population size of several lion areas to highlight differences in population estimates across the three primary continent-wide assessments and to updated information. The updated data are either from national or site-specific population assessments.

| **Lion Area** | **Region** | **Chardonnet (2002)** | **Bauer and Van Der Merwe (2004)** | **IUCN (2006)** | **New Data** | |
| --- | --- | --- | --- | --- | --- | --- |
| Comoe | West | 100 | 30 | <50 | 0 | Henschel et al. (2010) |
| Alibori Superieur & Trois Rivieres | West | 35 | N/A | N/A | 37 | Pellerin et al. (2009) |
| Mt. Kouffe & Wari Maro | West | N/A | 20 | <50 | 3 | Pellerin et al. (2009) |
| Laikipia-Samburu | East | 362 | 220 | 350 | 330 | KWS (2009) |
| Meru | East | 64 | 120 | 175 | 40 | KWS (2009) |
| Ruaha-Rungwa | East | 4,878 | N/A | 4,500 | 3,779 | Mesochina et al. (2010b) |
| Selous | East | 4,940 | 4,500 | 5,500 | 7,268 | Mesochina et al. (2010b) |
| Niassa (just Mozambique) | Southern | 650 | 175 | 1,025 | 1,553 | Chardonnet et al. (2009) |
| Upemba & Kundelungu | Southern | 50 | N/A | <100 | 0 | Henschel et al. (2010) |
| Kasungu | Southern | 5 | N/A | <10 | 6 | Mesochina et al. (2010c) |

Figure S1. Four focus areas used to compare and contrast the user-identified land conversion layer with other proxies for land conversion. Shown here is the comparison to human population density at 25 people per km2 (CIESIN and CIAT 2005) .


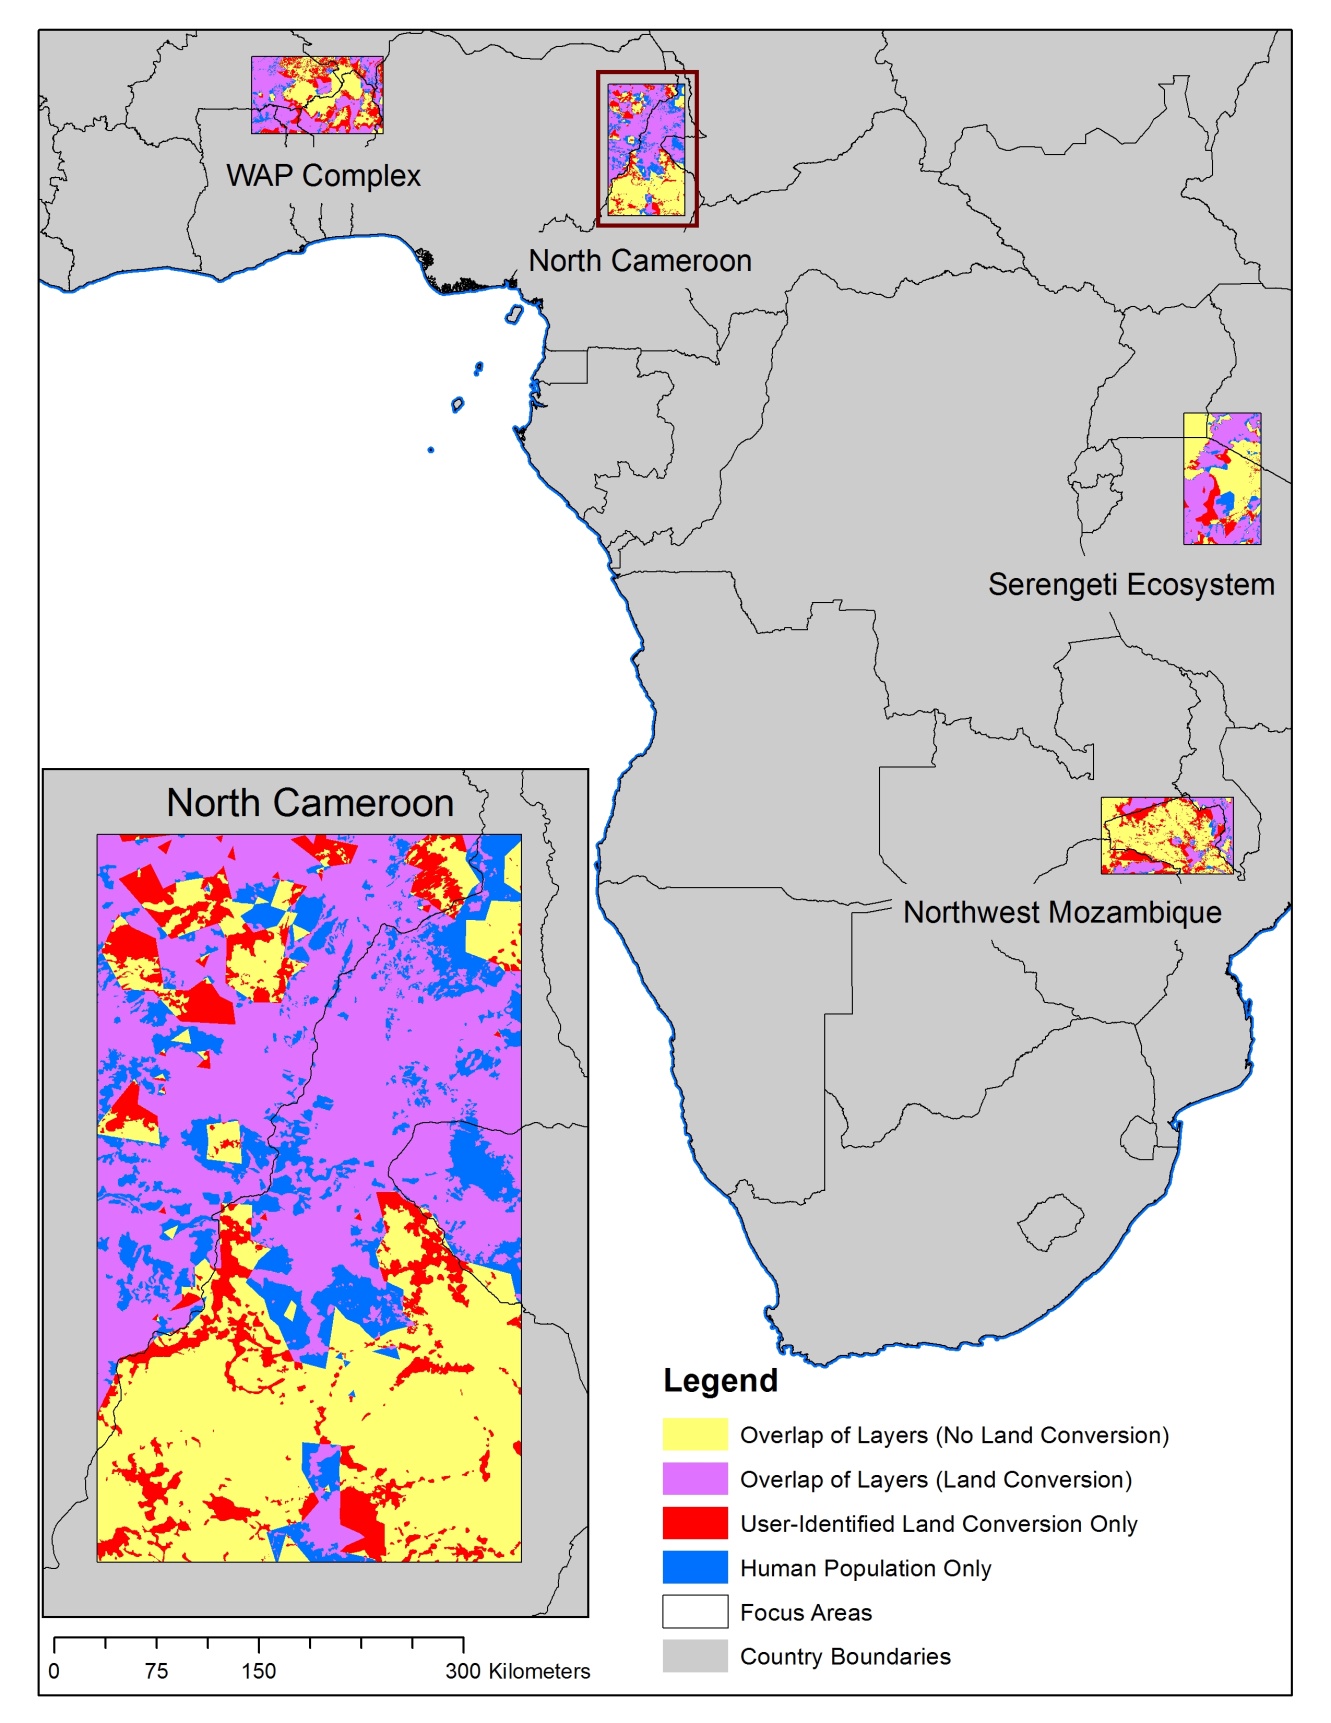


**References** (This contains only literature cited in the Supplemental Materials and not in the main body of the paper.)

Begg CM, Begg KS (2010) Niassa carnivore project annual report. Rondebosch, South Africa

Brugière D, Magassouba B (2003) Mammalian diversity in the National Park of Upper Niger, Republic of Guinea – an update. Oryx 37: 19-19

Croes B, Funston P, Rasmussen G, Buij R, Saleh A, et al. (2011) The impact of trophy hunting on lions (*Panthera leo*) and other large carnivores in the Bénoué Complex, northern Cameroon. Biol Conserv 144: 3064-3072

Funston P, Groom R, Joubert D (2011) Savé Valley Conservancy lion population survey 2011.

Gebresenbet F, Bauer H, Hunter L, Gebretensae K (2009) Proceedings of the national lion conservation workshop, Addis Ababa 12 June 2009

Groom R, Brand H (2011) Carnivore densities in Gonarezhou National Park: results of the June 2011 spoor survey

Kenya Wildlife Service (2009) National conservation and management strategy for lion and spotted hyena in Kenya (2009-2014). Nairobi, Kenya: Kenya Wildlife Service

Mudumba T, Mulondo P, Okot E, Nsubuga M, Plumptre AJ, et al. (2010) National census of lions and hyaenas in Uganda. Uganda: Uganda Wildlife Authority

Nyanganji G, Saidu Y, Henschel P, Dunn A (2012) 2011 survey of lion (*Panthera leo*) in Yankari Game Reserve and Kainji Lake National Park, Nigeria. http://www.panthera.org/sites/default/files/Nyanganji_et_al_2012_Nigeria_lion_survey_report.pdf. Accessed 24 March 2012

Shashe Limpopo Predator Research Group (2010) The status of large carnivores of the Greater Mapungubwe Transfrontier Conservation Area: 2004 to 2010. Bulawayo, Zimbabwe

Tumenta P, Kok J, Van Rijssel J, Buij R, Croes B, et al (2010) Threat of rapid extermination of the lion *(Panthera leo* ) in Waza National Park, Northern Cameroon. Afr J Ecol 48: 888-894

Vanherle N (2006) Inventaire et suivi de la population de lions du Parc National de Zakouma. N'Djamena, Chad
